# Supplementary material for: Function of Arabidopsis hexokinase-like1 as a negative regulator of plant growth
Source: PubMed Central journal article supplement — J Exp Bot. 2009 Aug 25;60(14):4137–49. doi: 10.1093/jxb/erp252 (PMC2755033; doi:10.1093/jxb/erp252), 2009-08-25

# Function of *Arabidopsis* hexokinase-like1 as a negative regulator of plant growth

Abhijit Karve, Brandon d. Moore

## Supplementary Material

**Figure S1.** The number of T-DNA insertions in *hkl1-1* as determined by real time PCR. Plot of  $2^{-\Delta\Delta C_t}$  for *hkl1-1* over a 1:5 dilution series of genomic DNA, using IQ SYBR green supermix (Bio-Rad) in an ABI step one plus real time PCR system. Insert-specific primers (L1INFP, 5'GACAACTTAATAACACATTGC3'; L1INRP, 5'GTCTCCTTGTTGCGAAGAGCCGT3') were designed to amplify 200 bp from *hkl1-1*. The PCR efficiencies for endogenous control amplicon (UBQ5) and for transgene amplicon (L1IN) were determined from standard curves starting with 200 ng of DNA template ( $E_{UBQ5} - 0.96$ ;  $E_{TDNA} - 0.92$ ). Col genomic DNA was used as a calibrator for the UBQ5 amplicon and as a negative control for the L1IN amplicon.

**Figure S2.** Growth under 16 h (long day) photoperiod conditions of transgenic *Arabidopsis* expressing HKL1 protein in different genetic backgrounds. HKL1-HA was expressed in *Ler* background, HKL1-Flag in *gin2-1* background. OE = overexpression.

**Figure S3.** Growth response on agar plates with varying glc concentrations for the transgenic HKL1-Flag line 43.

**Figure S4.** Transcript abundance by semi-quantitative RT-PCR of HXK1 and HKL1 from *Ler* seedlings grown on plates with 0.5% sucrose (-) or with 6% glucose (+). UBQ5 mRNA was measured as an internal control. PCR cycle numbers were either 28 (HXK1 and UBQ5) or 31 (HKL1).

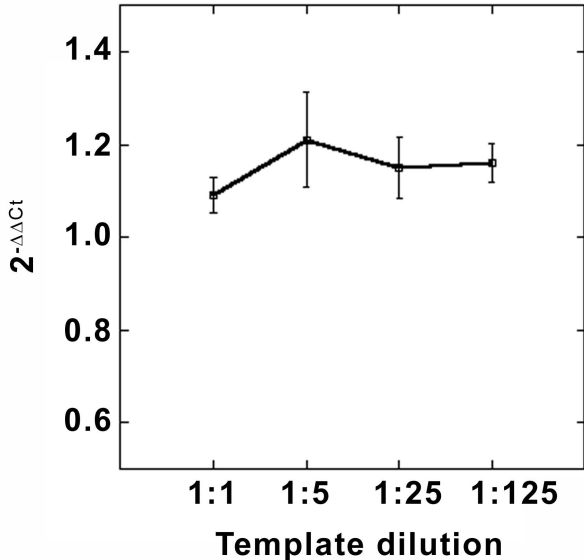

Ler BG

Ler

HKL1<sup>OE</sup>-Ln43

HKL1<sup>OE</sup>-Ln52

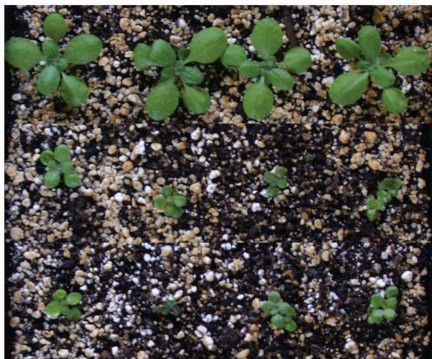

gin2-1 BG

*gin2-1*

HKL1<sup>OE</sup>-Ln64

HKL1<sup>OE</sup>-Ln79

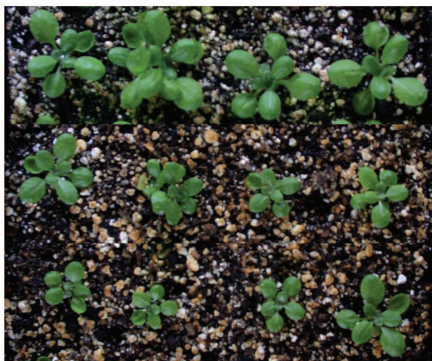

3%

7%

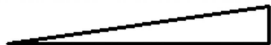

3%

7%

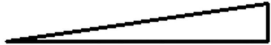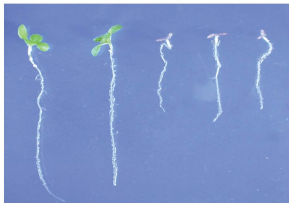

**Ler**

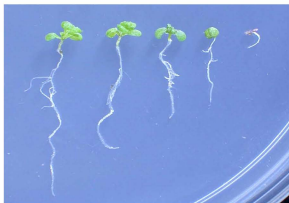

**L1<sup>OE</sup>-HA43**

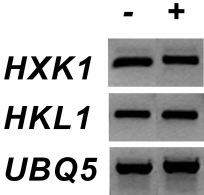

Supplement: erp252_1.pdf [file erp252_1.pdf]
